# Supplementary material
Source: publisher site journal article supplement (https://www.dovepress.com/article/550623)
Supplement: Supplementary file 1 [file Supplementary%20file_27th%20September%202025_1.docx]

**Supplementary Appendix 1 Feedback questions**

**Inaugural Interprofessional Education Activity: Student Feedback**

Student Information:

Age: Gender:

College: Year of study:

GPA: Prior exposure to IPE: Y/N

Dear student,

Thank you for participating in the IPE session. Your feedback is crucial for improving future sessions. Please rate your agreement with the following statements using the scale below: Rating Scale:

1: Strongly Disagree

2: Disagree

3: Neutral

4: Agree

5: Strongly Agree*Section 1: Perceptions of Interprofessional Collaboration*
1. Before this session, I was unaware of the role other healthcare professions play in managing patients with similar healthcare needs.

2. I now understand the importance of interprofessional collaboration in improving patient care outcomes.
3. I believe that patient safety can be significantly improved through effective collaboration among healthcare professionals.

***Section 2: Understanding Roles and Respect***

4.This session enhanced my understanding of the roles and responsibilities of other healthcare professions in patient care.

5. This session increased my respect for other healthcare professions involved in patient care.

6. I have gained a more positive view of the contributions that other healthcare professions make to patient care.
***Section 3: Session Experience and Future Application***7. This session was engaging and interesting.
8. The facilitators effectively guided the session, fostering an environment conducive to learning.
9. I would welcome and participate in future IPE sessions.
***Section 4: Curriculum and Integration***
10. I believe that interprofessional education should be a mandatory component in all health profession curricula.
 11. My current undergraduate curriculum offers sufficient opportunities to learn about other healthcare professions.

***Open-Ended Feedback:***What was the most valuable aspect of this IPE session?
 What suggestions do you have for improving future IPE sessions?

**Supplementary Appendix 2 Qualitative interview guide**

1. **Introduction (5-10 minutes)**

- Greet participants and introduce yourself.
- Explain the purpose of the discussion:

“Today, we’re here to discuss your experiences as facilitators in Ajman University’s inaugural IPE activity. We want to understand your perceptions, attitudes, and opinions, as well as any challenges or positive aspects you encountered. Your feedback will help us refine future IPE initiatives.”

- Clarify that there are no right or wrong answers, and all opinions are valuable.
- Explain that the session will be recorded for accuracy (if participants consent).
- Ask participants to introduce themselves (name, discipline, and their experience in facilitation).

1. **Warm-Up Questions (5 minutes)**

- How did you first hear about this IPE initiative?
- What were your initial thoughts when you were invited to be a facilitator?

1. **General Perceptions of the IPE Activity (10-15 minutes)**

- What were your expectations before the IPE activity began?
- Now that the activity is completed, how would you describe your overall experience as a facilitator?
- How did the experience compare with your expectations?
- How do you think this IPE activity benefited students from different disciplines?

1. **Attitudes Toward IPE (10 minutes)**

- How do you personally view interprofessional education in healthcare training?
- Do you believe this kind of activity is essential for healthcare students? Why or why not?
- Did this experience change your attitude towards IPE in any way?

1. **Role as a Facilitator (15-20 minutes)**

- How did you perceive your role as a facilitator in this activity?
- Did you feel well-prepared to facilitate discussions? Why or why not?
- What strategies did you use to engage students from different disciplines?
- Were there any challenges in moderating discussions?

(Probe: Were some students more dominant? Did any students struggle to participate?)

- Did students appear to understand and appreciate perspectives from other disciplines?
- What were some moments that stood out to you (either positively or negatively) during facilitation?

1. **Challenges & Areas for Improvement (15-20 minutes)**

- What were the main challenges you faced while facilitating this IPE session?
- (Probe: Case difficulty? Time management? Student participation? Group dynamics?)
- Were there any moments of miscommunication or misunderstanding between students from different disciplines?
- What were some aspects of the activity that you felt did not work well?
- What would have made your role as a facilitator easier or more effective?

1. **Likes, Dislikes, and Key Takeaways (10-15 minutes)**

- What did you like most about the IPE activity?
- What did you dislike or find frustrating?
- If we were to conduct this activity again, what would you suggest keeping the same?
- What would you suggest changing or improving?

1. **Future Recommendations (10 minutes)**

- How do you think IPE activities can be improved for future facilitators?
- Are there additional training or resources that would have helped you?
- What are your thoughts on expanding IPE initiatives at Ajman University?
- Would you be interested in facilitating future IPE sessions? Why or why not?

1. **Closing Remarks (5 minutes)**

**Ending:**

Thank participants for their valuable insights.

Reiterate that their feedback will contribute to shaping future IPE activities.

Ask if anyone has additional comments or thoughts they’d like to share.

Provide contact details for follow-up if needed.

**Supplementary Appendix 3 Students' responses to the two open-ended questions on the feedback questionnaire**

**What was the most valuable aspect of this IPE session?**

| Team working |
| --- |
| Good |
| Team work |
| Collaboration |
| Collaborating with students from different fields |
| Discussions, implementing knowledge on real life scenarios, different perspective with sufficient info backgrounds |
| Learning new things from my colleagues |
| Dr. Lamees |
| The interactive discussion and sharing knowledge |
| Teamwork |
| More knowledge about other colleges and a nice collaboration best Dr. Lamees |
| I learned alot of things today and how important working together to save lives |
| Inter professional collaboration by |
| Team work |
| Interaction |
| The team collaboration |
| It was very fun |
| Cooperativity |
| Learning the importance of polyclinic |
| Knowing the role and the importance of each healthcare professional |
| Learning how students from other specialities think and work with us |
| Teamwork |
| Exposing myself to other health care colleagues to enhance collaboration and communication skills |
| Everything |
| Sharing different Ideas and learning new information from other healthcare sciences |
| I knew how much important is the role of every healthcare professional in the team |
| Sharing knowledge |
| Team collaboration |
| Learning more how to handle a case from the beginning |
| We likeeeddd it so muchhh |
| Team work |
| Learning from different disciplines and majors |
| Learned a lot more about how other healthcare team could contribute in managing a patient. |
| Engaging with health care individuals from another departments was really helpful and helped me understand the patient status from different aspects |
| We learned together |
| Learning the different perspectives and points of view held by healthcare providers of other professions in their approach to the case. |
| I felt like a realistic MDT experience. |
| Communaction with other professions |
| Communication between the multidisciplinary |
| Appreciate other profession roles in driving patient centered are |
| Very important to improve communication skills |
| Roles of each one of us |
| Nothing |
|  |
| How the MDT affects the management of the patient |
| Communication |
| Teamwork |
| I loved Dr Amr and the way he included us in the discussion |
| The discussions were very educational and helpful |
| Communication |
| The discusion |
| Communication and contribution |
| Contribution is crucial for a good treatment plan. |
| Intervention |
| fostering an environment conducive to learning |
| Intercation |
| Learning emergency management of trauma cases from the perspective of other specialties |
| The most valuable aspect was improved collaboration, communication, and a broader clinical perspective, enhancing teamwork and patient care. |
| Getting to gain deeper insights about different perspectives of different HCPs. Getting to socialize and know people is always a plus point for me. |
| I learned how solving a case is not only related to my profession. Other professions have a very important role as well. It was very interesting to see all the students participate and learn together about things. I enjoyed it a lot and I would most definitely participate in a future event like this. |
| It was very interactive session and everyone had the opportunity to share their thoughts and information and respect each others opinions |
| I liked the environment however i didnâ€™t like our facilitator since she was having an attitude towards pharmacy student and biased towards her medical students. Before we begin the session it was me and my friend assigned to her table ( i believe her name was Dr. Maryam paediatric doctor) my friend was a bit late due to some personal reasons and she started making comments sarcastic about how she is unprofessional. Furthermore, when we started the session her main focus was her medicine students and she mentioned how they are very important in such case. She didnâ€™t distribute the case she was taking control over the whole thing and reading not allowing us to actually participate. Moreover, before we start she wanted to include a third medical doctor instead of a pharmacist. As she was reading the case and asking questions i had little discussion about another medication that could be given for the case ( which was very confusing to understand since she was the one reading and iâ€™m a visual learner ) I wanted to recommend another medication she told me iâ€™m wrong and when i tried discussing RESPECTFULLY she didnâ€™t try and discuss and she just said that iâ€™m wrong and thatâ€™s from the dr and embarrassed me infront of the group. Also at the end when we were supposed to discuss the medication to discharge the patient she asked the medicine and the dentist team and then she said and tell the pharmacist what to to dispense and thatâ€™s it she didnâ€™t ask for our opinions or nothing. That was such a bad experience and iâ€™m extremely disappointed because my friends told me they had so much fun yet i was treated disrespectfully by a doctor when iâ€™m supposed to be learning from the experience. Thank you. |
| The most important aspect in my opinion is seeing how the knowledge of each healthcare professional completes one another, such an insight eliminates the urge of challenge between healthcare professionals |
| The collaboration with other specialists in the medical field |
| Getting to know other ppl from different collages |
| Understanding the different point of views of different healthcare professions and predicting their input into the treatment plan |
| to get together with a group of other healthcare providers to engage discussion take their point of views but similar concern to help and save patients life really loved how everyone communicated and the doctor ala (dentist) her guidance were valuable too ðŸ’ž |
| Studing a case from multiple poits of veiws with different backgrounds, and learning from different majors expertise. |
| The knowledge and experience of engaging with other professions |
| The IPE event was an amazing experience, where all of us worked seamlessly together as one team to solve the case. Each person brought their unique expertise to the table, contributing valuable insights and ideas. It was inspiring to see how everyone collaborated and supported each other, ensuring that we tackled every aspect of the challenge effectively. The teamwork and collective effort made the event both enjoyable and rewarding. |
| Learning how every health care profession would approach a patient case from the aspect that applies to their knowledge and building a skill, through communication, on how to use that to provide the best treatment to patients. |
| To work in groups and have a better understanding of our roles |
| The most valuable part of the IPE event was the collaboration among healthcare professionals in solving the patientâ€™s case. Each professional contributed unique knowledge that others may not have been aware of, enhancing everyoneâ€™s understanding. This highlights the importance of teamwork in healthcare, as no single professional can work in isolationâ€”effective patient care requires collective effort. |
| The collaboration with other specialists |
| seeing the different (clinical) priorities of each discipline and how students communicated to reach common grounds for best healthcare delivery strategy |
| Learning about different perspectives |
| Getting to listen and learn from students of other disciplines. |
| Cooperation of information from various colleges |
| Good Discussion |
| Interacting with other facilities and see their point of view |
| Team work |
| The most valuable aspect of this Interprofessional Education (IPE) session was likely the opportunity to collaborate with students from different healthcare disciplines. |
| We all collaborated as a healthcare providers team. It was amazing experience |
| Working with a team |
| Team work |
| It was a wonderful session learned so much |
| sharing knowledge, acknowledging one's limitation |
| Everything |
| The collaboration of all healthcare professionals to better manage the pateint. |
| Thank u |
| The teamwork |

**What suggestions do you have for improving future IPE sessions?**

| To include it in every collage |
| --- |
| Good |
| Making case more real life like |
| More cases and more sessions |
| Make a competition |
| Choose the table with Dr.Lamees shes the best |
| More disciplines for pharmacy, dental and nursing as it felt more of Medicine |
| Keep dr lamees always |
| To add a second nursing student |
| Itâ€™s was wonderful |
| More information about the case and the patient and more imaging |
| More team members and longer cases |
| Make it more competitive, one table should be the winner |
| Do more of them |
| Make more of them with other colleges so everyone can lesrn |
| Perfect |
| Involving real patients would be more realistic |
| Nothing |
| do more and more IPE sessions and make it choicable as Iâ€™m students choose which group to go for |
| If the cases were more detailed and a little bit complicated, it will be more interesting |
| Perfect |
| Make it more often and get more snacks |
| To increase numbers of cases |
| Do it mooore and mooorreee |
| To bring it to official hospital settings. |
| Make the sessions a bit more complex |
| Nil |
| To have an actor who does the patient role could be more convincing |
| Nothing |
| Provide images to make the case feel more authentic |
| To distribute the optimal management at the end to learn from the cases. |
| Enhance our critical thinking |
| Increasing knowledge before coming |
| Teach nursing students more please |
| Having more cases would be fun |
| More time |
| 2 students from each major |
| Make it more often |
| Longer case discussions |
| It should happen more often |
| More hands on and interaction |
| Having a group discussion with everyone or having different cases per group |
| Having different cases |
| Nothing |
|  |
| no suggestions. Format was great. Facilitator was very knowledgeable and experienced in running the session |
| Use more case-based learning, smaller group discussions, hands-on activities, clear role definitions, and feedback opportunities. |
| Maybe a more detailed case. |
| I think the case included all the students but in a way that for example pharmacy density students couldnâ€™t really understand some of what the medical students were saying and for example nursing pharmacy and medicine didnâ€™t understand what the dentistry students were saying and etc. maybe there can be a part when each student answers they can explain to the others what it is. Otherwise it was very good and I liked it a lot. |
| More sessions of IPE would be beneficial for students and making the number of students equally distributed in the group according each major |
| I think having a facilitator from each college to actually teach the students is important so everyone enjoys the experience and learn from it. I wanted to have this experience to get me into the field more but i felt disrespected and making me not want to work in hospitals. |
| Maybe make it more of a competition, with more than 1 case to solve, also either making it a complete course that is shared by all medical colleges or seminars where students are educated about the topic, maybe even mini workshops regarding the topic |
| Improve the discussion between students still there is a gap between medicine students and other college students |
| Adding more nursing scenarios so we can engage more in the observation |
| I would like to see a more engaging case. I would also love it if the facilitators didn't really guide the session and it was guided by a student of choice by the team. Basically more of a real life setting and more realistic situation. |
| I would love to have more sessions of ipe to learn more from everyone and discuss on different situations. |
| More detaild cases, migh have an actual patient/ role play, more complicated cases for more discussions:). |
| Do more sessions, it was interesting |
| To improve future IPE sessions, it would be helpful to include more doctors, particularly from both medicine and dentistry. This would provide diverse perspectives alongside pharmacy, enriching collaboration and enhancing learning. Having these professionals would better prepare students for real-world interdisciplinary healthcare. |
| Implement a method to only include people who are truly interested in engaging with others, perhaps by asking the facilitators to rate every studentâ€™s desire in learning from others. And make it literally every week if not every day, Iâ€™d be more than willing to attend since the session was extremely enriching. 10/10 |
| Nothing |
| Ensure each healthcare professionalâ€™s role is clearly outlined to maximize their contribution and prevent overlap or confusion. |
| I have really enjoyed it, and I would like in future to have more complex scenarios |
| Letting more nursing students to participate |
| Making it an event lasting a couple of days and having the students participating attend a prep session for method on how to effectively communicate with other healthcare providers |
| Put students with similar year/level of education together |
| Introduce competition between groups. |
| Nothing |
| Detailed case |
| Facilitators should guide students how to collaborate with others more :) |
|  |
| Real-World Scenarios |
| None |
| more sessions, especially ones the would focus on other professions like dentistry and nursing as this session felt like it was mostly dominated by Medicine. |
| It was perfect |
| In my opinion everything was good |
| To be more interactive, maybe with some simulation and hands on procedures |
| Pls do it again |
| The lead of the team should also be a student |
